# Supplementary material for: The Mixing Ratio and Filling-Amount Affect the Tissue Browning and Antioxidant Properties of Fresh-Cut Baby Leaf Lettuce (Lactuca sativa L.) and Rocket (Eruca sativa Mill.) Grown in Floating Growing Systems
Source: MDPI journal article supplement (doi:10.3390/foods11213515), 2022-11-04
Supplement: s1 [file s1]

**Supplementary Table S1.** *Pearson correlation analysis of the selected variables.*

| Variables |                     | AC | TP      | AA      | PAL     |
|-----------|---------------------|----|---------|---------|---------|
| AC        | Pearson Correlation | 1  | 0.770** | 0.535** | 0.608** |
|           | Sig. (2-tailed)     |    | 0.000   | 0.001   | 0.000   |
|           | N                   | 36 | 36      | 36      | 36      |
| TP        | Pearson Correlation |    | 1       | 0.549** | 0.596** |
|           | Sig. (2-tailed)     |    |         | 0.001   | 0.000   |
|           | N                   |    | 36      | 36      | 36      |
| AA        | Pearson Correlation |    |         | 1       | 0.690** |
|           | Sig. (2-tailed)     |    |         |         | 0.000   |
|           | N                   |    |         | 36      | 36      |
| PAL       | Pearson Correlation |    |         |         | 1       |
|           | Sig. (2-tailed)     |    |         |         |         |
|           | N                   |    |         |         | 36      |

N = number of replicates; \*\*Correlation is significant at the 0.01 level (2-tailed); \*Correlation is significant at the 0.05 level (2-tailed).
